# Supplementary material for: Effects of elevated CO 2 and N fertilization on plant and soil carbon pools of managed grasslands: a meta-analysis
Source: Copernicus journal article supplement (doi:10.5194/bg-9-2247-2012), 2012-06-22
Supplement: Supplementary file 1 [file SI_Sillen _&_Dieleman.xlsx]

## Sheet: S1_SITES
General information about the sites included in the database. The experiments performed at these sites can include one of the treatments or species listed in
the columns below. Site location, annual precipitation and temperature are given where available.
Site Name	Treatments	Species	Latitude	Lat	Longitude	Lon	MAP	MAT
Aberdeen	CO2xFertilization	Lolium perenne	57	N	2	W
Amsterdan	CO2	six different non-woody species	52.37	N	4.9	E
Canberra Phytotron	CO2xFertilization	Danthonia richardsonii	35.3	S	149.12	E
Cedar Creek_grassland (BioCON)	CO2xFertilization	perennial grassland	45.4	N	93.2	W	660
Duolun	WarmingxFertilization	steppe	42.03	N	116.28	E	385.5	2.1
French Massif Central	CO2xWarmingxWater	Grassland	45.75	N	3	E	780	8.7
Gainesville	CO2	Arachis glabrata, Paspalum notatum	29.67	N	82.34	W	808
Ginninderra	CO2xWarming	Phalaris aquatica	35.22	S	149.13	E
Jasper Ridge_FACE	CO2xFertilizationxWarmingxWater	California annual grassland	37.67	N	122.37	W	677	19.3
Jasper Ridge_OTC	CO2	Sandstone grassland	37.67	N	122.37	W	677	19.3
Jasper Ridge_OTC	CO2	Serpentine grassland	37.67	N	122.37	W	677	19.3
Jasper Ridge_OTC	CO2xFertilization	Sandstone grassland	37.67	N	122.37	W	677	19.3
Jasper Ridge_OTC	CO2xFertilization	Serpentine grassland	37.67	N	122.37	W	677	19.3
Jokioinen	CO2	Hay meadow	60.82	N	23.47	E
Linden-Leihgestern FACE	CO2	Arrhenatherum elatius grassland	50.53	N	8.68	E	644	9.9
Manawatu	CO2	grassland	40.23	S	175.27	E	870	12.9
Moor House	CO2xSoil	Grassland	54.5	N	3.25	E
Nåntuna	CO2	semi-natural grassland	59.8	N	17.63	E	527	5.5
NERC	CO2xWarming	Grassland model ecosystem	51.38	N	0.65	W
New Zealand FACE	CO2	temperate pasture	40.23	S	175.27	E	875
Niwot Ridge	Fertilization	dry alpine meadow	40.5	N	105.6	W	900	-3
OCCAM	CO2xWarmingxWater	Model grassland	36	N	84	W	1322	14.3
PHACE	CO2xWarmingxWater	northern mixed-grass prairie	41.18	N	104.9	W	384
Swiss Central Alps	CO2xFertilization	Sedge dominated grassland	46.58	N	8.38	E	168	8.4
Swiss Jura	CO2	Calcareous grassland	47.45	N	7.57	E	1063
SwissFACE_bromus/carex	CO2	Bromus erectus, Carex flacca	47.45	N	8.95	E
SwissFACE_lolium	CO2xFertilization	Lolium perenne	47.45	N	8.95	E
SwissFACE_trifolium	CO2xFertilization	Trifolium repens	47.45	N	8.95	E
TasFACE	CO2xWarming	species-rich temperate grassland	42.7	S	147.27	E	560	11.6
Univerisity of Antwerp_Mycarbio	CO2xWarming	Model grassland	51.17	N	4.38	E
Univerisity of Guelph	CO2	Artemisia tridentata	43.55	N	80.25	W
UMBS	CO2	Brassica nigra	45.55	N	84.78	W
USDA ARS	CO2	Lepidium latifolium	31.08	N	97.33	W
USDA Central Plains	CO2	Shortgrass steppe	40.67	N	104.75	W	320
31

## Sheet: S2_EXPERIMENTS
All experiments included in the database are listed, fumigation and fertilization amounts used in the experiments are indicated.
Experiment Name	Treatments	CO2 Quantity	Fumigation type	Fertilization type	N quantity
Aberdeen_lolium_c	CO2	200	Controlled Environmental Chambers
Aberdeen_lolium_cf	CO2xFertilization	200	Controlled Environmental Chambers	nutrient mixture (N and P)
Amsterdan_c	CO2	350	greenhouses	NPK	4.7 g N m-2 yr-1
BioCON_c	CO2	195	FACE
BioCON_f	Fertilization			NH4NO3	4 g N m-2 yr-1
Canberra_cLf	CO2xFertilization	360	mesoscosms	N	2.2 g N m-2 yr-1
Canberra_cMf	CO2xFertilization	360	mesoscosms	N	6.7 g N m-2 yr-1
Canberra_cHf	CO2xFertilization	360	mesoscosms	N	19.8 g N m-2 yr-1
Cedar Creek_f_g1	Fertilization			NH4NO3	4 g N m-2 yr-1
Cedar Creek_f_g2	Fertilization			NH4NO3	10 g N m-2 yr-1
Duolun_f	Fertilization			NH4NO3	10 g N m-2 yr-1
Duolun_wf	WarmingxFertilization			NH4NO3	10 g N m-2 yr-1
FMC_cwd	CO2xWarmingxWater	220	FACE
Gainesville_ag_c	CO2			NPK (and Mg and S)	7-8 g N m-² depending on year
Gainesville_pn_c	CO2			NPK (and Mg and S)	7-8 g N m-² depending on year
Ginninderra_c	CO2	380	controlled injection in gradient tunnels	slow release fertilizer	10 g m-2 yr-1 N
Ginninderra_cw1	CO2xWarming	380	controlled injection in gradient tunnels	slow release fertilizer	10 g m-2 yr-1 N
Ginninderra_cw2	CO2xWarming	380	controlled injection in gradient tunnels	slow release fertilizer	10 g m-2 yr-1 N
Jasper Ridge_FACE1_cw	CO2xWarming	300	FACE
Jasper Ridge_FACE2_cfw	CO2xFertilizationxWarming	300	FACE	Ca(NO3)2	7 g N m-2 yr-1
Jasper Ridge_FACE2_cfwh	CO2xFertilizationxWarmingxWater	300	FACE	Ca(NO3)2	7 g N m-2 yr-1
Jasper Ridge_FACE2_cwh	CO2xWarmingxWater	300	FACE
Jasper Ridge_FACE3_c	CO2	300	FACE
Jasper Ridge_FACE3_cf	CO2xFertilization	300	FACE	Ca(NO3)2	7 g N m-2 yr-1
Jasper Ridge_FACE3_ch	CO2xWater	300	FACE
Jasper Ridge_FACE3_chf	CO2xFertilizationxWater	300	FACE	Ca(NO3)2	7 g N m-2 yr-1
Jasper Ridge_FACE3_f	Fertilization			Ca(NO3)2	7 g N m-2 yr-1
Jasper Ridge_FACE3_hf	FertilizationxWater			Ca(NO3)2	7 g N m-2 yr-1
Jasper Ridge_FACE3_wf	FertilizationxWarming			Ca(NO3)2	7 g N m-2 yr-1
Jasper Ridge_FACE3_wfh	FertilizationxWarmingxWater			Ca(NO3)2	7 g N m-2 yr-1
Jasper Ridge_OTC2sand_c	CO2	360	OTC
Jasper Ridge_OTC2ser_c	CO2	360	OTC
Jasper Ridge_OTCsand_c	CO2	390	microcosms	NPK (120 day release fertilizer)	3 g m-2
Jasper Ridge_OTCsand_cf	CO2xFertilization	390	microcosms	NPK (120 day release fertilizer)	20 g N m-2
Jasper Ridge_OTCsand_f	Fertilization			NPK (120 day release fertilizer)	20 g N m-2
Jasper Ridge_OTCser_c	CO2	390	microcosms	NPK (120 day release fertilizer)	3 g m-2
Jasper Ridge_OTCser_cf	CO2xFertilization	390	microcosms	NPK (120 day release fertilizer)	20 g N m-2
Jasper Ridge_OTCser_f	Fertilization			NPK (120 day release fertilizer)	20 g N m-2
Jokioinen_c	CO2	140	OTC
Linden-LeihgesternFACE_c	CO2	75	FACE	Thomas kali fertilizer and N	0.4 g N m-2
Manawatu_c	CO2	110	FACE	superphosphate, K2SO4, MgSO4, Cu and Zn	-
Moor House_bpp_c	CO2	250	solardomes
Moor House_brl_c	CO2	250	solardomes
Nåntuna_c	CO2	350	OTC
NERC_c	CO2	200	controlled chambers
NERC_cw	CO2xWarming	200	controlled chambers
New Zealand FACE_c	CO2	110	FACE	superphosphate, KSO4	-
Niwot Ridge_f	Fertilization			urea-N as osmocote pellets	25 g N m-2 yr-1 for the first two years, 10 g N m-2 yr-1 thereafter
Niwot Ridge_ dm_f	Fertilization			osmocote pellets (urea-N and P2O5-P)	25 g N m-2 yr-1 for the first two years, 10 g N m-2 yr-1 thereafter
Niwot Ridge_ dm_f+	Fertilization			osmocote pellets (urea-N and P2O5-P)	25 g N m-2 yr-1 for the first two years, 10 g N m-2 yr-1 thereafter
Niwot Ridge_ wm_f	Fertilization			osmocote pellets (urea-N and P2O5-P)	25 g N m-2 yr-1 for the first two years, 10 g N m-2 yr-1 thereafter
Niwot Ridge_ wm_f+	Fertilization			osmocote pellets (urea-N and P2O5-P)	25 g N m-2 yr-1 for the first two years, 10 g N m-2 yr-1 thereafter
OCCAM_c	CO2	300	OTC
OCCAM_ch	CO2xWater	300	OTC
OCCAM_cw	CO2xWarming	300	OTC
OCCAM_cwh	CO2xWarmingxWater	300	OTC
PHACE_c	CO2	240	FACE
PHACE_cw	CO2xWarming	240	FACE
Swiss Central Alps_c	CO2	325	OTC
Swiss Central Alps_cf	CO2xFertilization	325	OTC	NPK (3:2:3)	4.5 g N m-2 yr-1
Swiss Central Alps_f	Fertilization			NPK (3:2:3)	4.5 g N m-2 yr-1
Swiss Jura_c	CO2	240	Screen Aided CO2 Control (SACC)	low dose P fertilization (superphosphate)	-
SwissFACE_bromus/carex_c	CO2	245	FACE
SwissFACE_lolium2_c	CO2	250	FACE	NH4NO3	14 g m-2 yr-1
SwissFACE_lolium2_cf	CO2xFertilization	250	FACE	NH4NO3	42 g m-2 yr-1 in 1993 and 56 g m-2 yr-1 after 1993
SwissFACE_lolium2_f	Fertilization			NH4NO3	42 g m-2 yr-1 in 1993 and 56 g m-2 yr-1 after 1993
SwissFACE_trifolium2_c	CO2	250	FACE	NPK, N as NH4NO3 solution	14 g m-2 yr-1
SwissFACE_trifolium2_cf	CO2xFertilization	250	FACE	NPK, N as NH4NO3 solution	56 g m-2 yr-1
SwissFACE_trifolium2_f	Fertilization			NPK, N as NH4NO3 solution	56 g m-2 yr-1
TasFACE_c	CO2	180	FACE
TasFACE_cw	CO2xWarming	180	FACE
UA_Mycarbio	CO2xWarming	350	greenhouses
UG_Artemisia	CO2	350	Controlled Environmental Chambers	Half strength Hoagland solution
UMBS_Brassica	CO2	350	OTC
USDA ARS_ps_c	CO2	340	greenhouses
USDA ARS_rs_c	CO2	340	greenhouses
USDA Central Plains_c	CO2	360	OTC
77

## Sheet: S3_DATAPOINTS
All experiments included in the database are listed, and stars indicate which experiment provided what kind of data.
Experiment Name	AB	BB	RS	MBC	SOC
Aberdeen_lolium_c	*
Aberdeen_lolium_cf	*
Amsterdam_greenhouses_c	*
BioCON_c	*	*	*	*
BioCON_f	*	*	*	*
Canberra_cLf				*
Canberra_cMf				*
Canberra_cHf				*
Cedar Creek_f_g1				*	*
Cedar Creek_f_g2				*	*
Duolun_w	*
Duolun_wf	*
FMC_cwd	*
Gainesville_ag_c					*
Gainesville_pn_c					*
Ginninderra_c	*	*	*
Ginninderra_cw1	*	*	*
Ginninderra_cw2	*	*	*
Jasper Ridge_FACE1_cw	*	*	*
Jasper Ridge_FACE2_cfw	*	*	*
Jasper Ridge_FACE2_cfwh	*	*	*
Jasper Ridge_FACE2_cwh	*	*	*
Jasper Ridge_FACE3_c	*	*	*
Jasper Ridge_FACE3_cf	*	*	*
Jasper Ridge_FACE3_ch	*	*	*
Jasper Ridge_FACE3_chf	*	*	*
Jasper Ridge_FACE3_f	*	*	*
Jasper Ridge_FACE3_hf	*	*	*
Jasper Ridge_FACE3_wf	*	*	*
Jasper Ridge_FACE3_wfh	*	*	*
Jasper Ridge_OTC2sand_c	*	*	*	*	*
Jasper Ridge_OTC2ser_c	*	*	*	*	*
Jasper Ridge_OTCsand_c	*	*	*		*
Jasper Ridge_OTCsand_cf	*	*	*		*
Jasper Ridge_OTCsand_f	*	*	*		*
Jasper Ridge_OTCser_c	*	*	*		*
Jasper Ridge_OTCser_cf	*	*	*		*
Jasper Ridge_OTCser_f	*	*	*		*
Jokioinen_c				*
Linden-LeihgesternFACE_c				*
Manawatu_c				*	*
Moor House_bpp_c		*
Moor House_brl_c		*
Nåntuna_c	*
NERC_c		*		*
NERC_cw		*		*
New Zealand FACE_c	*	*	*	*
Niwot Ridge_f					*
Niwot Ridge_ dm_f		*
Niwot Ridge_ dm_f+		*
Niwot Ridge_ wm_f		*
Niwot Ridge_ wm_f+		*
OCCAM_c	*
OCCAM_ch	*
OCCAM_cw	*
OCCAM_cwh	*
PHACE_c	*	*	*
PHACE_cw	*	*	*
Swiss Central Alps_c	*	*	*	*	*
Swiss Central Alps_cf	*	*	*	*	*
Swiss Central Alps_f	*	*	*	*	*
Swiss Jura_c	*	*	*	*	*
SwissFACE_bromus/carex_c	*
SwissFACE_lolium2_c	*	*	*	*	*
SwissFACE_lolium2_cf	*	*	*	*	*
SwissFACE_lolium2_f	*	*	*		*
SwissFACE_trifolium2_c					*
SwissFACE_trifolium2_cf				*	*
SwissFACE_trifolium2_f					*
TasFACE_c	*	*	*		*
TasFACE_cw	*	*	*		*
UA_Mycarbio	*
UG_Artemisia	*	*	*
UMBS_Brassica	*	*	*
USDA ARS_ps_c	*				*
USDA ARS_rs_c	*				*
USDA Central Plains_c	*				*
77	55	47	39	22	29
	192

## Sheet: S4_SOURCE REFERENCES
All experiments included in the database are listed.
Source references used for the respective sites are given in the last column (Full references are given in supplementary table "Full references").
Experiment Name	AB	RB	MBC	SOC
Aberdeen_lolium_c	Paterson et al., 2008
Aberdeen_lolium_cf	Paterson et al., 2008
Amsterdam_greenhouses_c	Hoorens et al., 2003
BioCON_c			Dijkstra et al., 2006
BioCON_f			Dijkstra et al., 2006
Canberra_cLf			Lutze et al., 2000
Canberra_cMf			Lutze et al., 2000
Canberra_cHf			Lutze et al., 2000
Cedar Creek_f_g1	Keeler et al., 2009	Keeler et al., 2009	Keeler et al., 2009	Keeler et al., 2009
Cedar Creek_f_g2	Keeler et al., 2009	Keeler et al., 2009	Keeler et al., 2009	Keeler et al., 2009
Duolun_w	Xia et al., 2009
Duolun_wf	Xia et al., 2009
FMC_cwd	Bloor et al., 2010
Gainesville_ag_c				Allen et al., 2006
Gainesville_pn_c				Allen et al., 2006
Ginninderra_c	Volder et al., 2007	Volder et al., 2007
Ginninderra_cw1	Volder et al., 2007	Volder et al., 2007
Ginninderra_cw2	Volder et al., 2007	Volder et al., 2007
Jasper Ridge_FACE1_cw	Dukes et al., 2005	Dukes et al., 2005
Jasper Ridge_FACE2_cfw	Dukes et al., 2005	Dukes et al., 2005
Jasper Ridge_FACE2_cfwh	Dukes et al., 2005	Dukes et al., 2005
Jasper Ridge_FACE2_cwh	Dukes et al., 2005	Dukes et al., 2005
Jasper Ridge_FACE3_c	Dukes et al., 2005	Dukes et al., 2005
Jasper Ridge_FACE3_cf	Dukes et al., 2005	Dukes et al., 2005
Jasper Ridge_FACE3_ch	Dukes et al., 2005	Dukes et al., 2005
Jasper Ridge_FACE3_chf	Dukes et al., 2005	Dukes et al., 2005
Jasper Ridge_FACE3_f	Dukes et al., 2005	Dukes et al., 2005
Jasper Ridge_FACE3_hf	Dukes et al., 2005	Dukes et al., 2005
Jasper Ridge_FACE3_wf	Dukes et al., 2005	Dukes et al., 2005
Jasper Ridge_FACE3_wfh	Dukes et al., 2005	Dukes et al., 2005
Jasper Ridge_OTC2sand_c	Hungate et al., 1997	Hungate et al., 1997	Hungate et al., 1997	Hungate et al., 1997
Jasper Ridge_OTC2ser_c	Hungate et al., 1997	Hungate et al., 1997	Hungate et al., 1997	Hungate et al., 1997
Jasper Ridge_OTCsand_c	Cardon et al., 2001	Cardon et al., 2001		Cardon et al., 2001
Jasper Ridge_OTCsand_cf	Cardon et al., 2001	Cardon et al., 2001		Cardon et al., 2001
Jasper Ridge_OTCsand_f	deduced from Cardon et al., 2001	deduced from Cardon et al., 2001		deduced from Cardon et al., 2001
Jasper Ridge_OTCser_c	Cardon et al., 2001	Cardon et al., 2001		Cardon et al., 2001
Jasper Ridge_OTCser_cf	Cardon et al., 2001	Cardon et al., 2001		Cardon et al., 2001
Jasper Ridge_OTCser_f	deduced from Cardon et al., 2001	deduced from Cardon et al., 2001		deduced from Cardon et al., 2001
Jokioinen_c			Kanerva et al., 2008
Linden-LeihgesternFACE_c			Sonneman & Wolters, 2005
Manawatu_c			Ross et al., 2004	Ross et al., 2004
Moor House_bpp_c		Fitter et al., 1997
Moor House_brl_c		Fitter et al., 1997
Nåntuna_c	Marissink et al., 2002
NERC_c		Kandeler et al., 1998	Kandeler et al., 1998
NERC_cw		Kandeler et al., 1998	Kandeler et al., 1998
New Zealand FACE_c	Allard et al., 2005	Allard et al., 2005	Allard et al., 2005
Niwot Ridge_f				Neff et al., 2002
Niwot Ridge_ dm_f		Bowman et al., 1993
Niwot Ridge_ dm_f+		Bowman et al., 1993
Niwot Ridge_ wm_f		Bowman et al., 1993
Niwot Ridge_ wm_f+		Bowman et al., 1993
OCCAM_c	Kardol et al., 2010
OCCAM_ch	Kardol et al., 2010
OCCAM_cw	Kardol et al., 2010
OCCAM_cwh	Kardol et al., 2010
PHACE_c	Dijkstra et al., 2010	Dijkstra et al., 2010
PHACE_cw	Dijkstra et al., 2010	Dijkstra et al., 2010
Swiss Central Alps_c	Schäppi & Körner, 1996	Schäppi & Körner, 1996	Niklaus & Körner, 1996	Niklaus & Körner, 1996
Swiss Central Alps_cf	Schäppi & Körner, 1996	Schäppi & Körner, 1996	Niklaus & Körner, 1996	Niklaus & Körner, 1996
Swiss Central Alps_f	deduced from Schäppi & Körner, 1996	deduced from Schäppi & Körner, 1996	deduced from Niklaus & Körner, 1996	deduced from Niklaus & Körner, 1996
Swiss Jura_c	Niklaus & Körner, 2004	Leadley et al., 1999	Niklaus, 1998	Stocker et al., 1999
SwissFACE_bromus/carex_c	Van Kleunen et al., 2006
SwissFACE_lolium2_c	Bazot et al., 2006	Bazot et al., 2006	Sowerby et al., 2000	De Graaff et al., 2004
SwissFACE_lolium2_cf	Bazot et al., 2006	Bazot et al., 2006	De Graaff et al., 2004	De Graaff et al., 2004
SwissFACE_lolium2_f	deduced from Bazot et al., 2006	deduced from Bazot et al., 2006		deduced from De Graaff et al., 2004
SwissFACE_trifolium2_c				De Graaff et al., 2004
SwissFACE_trifolium2_cf			De Graaff et al., 2004	De Graaff et al., 2004
SwissFACE_trifolium2_f				deduced from De Graaff et al., 2004
TasFACE_c	Pendall et al., 2011	Pendall et al., 2011		Pendall et al., 2011
TasFACE_cw	Pendall et al., 2011	Pendall et al., 2011		Pendall et al., 2011
UA_Mycarbio	unpublished
UG_Artemisia	Klironomos et al., 1998	Klironomos et al., 1998
UMBS_Brassica	Treonis & Lussenhop, 1997	Treonis & Lussenhop, 1997
USDA ARS_ps_c	Blank & Derner, 2004			Blank & Derner, 2004
USDA ARS_rs_c	Blank & Derner, 2004			Blank & Derner, 2004
USDA Central Plains_c	Morgan et al., 2004			Pendall & King, 2007

## Sheet: S5_FULL REFERENCES
Full source references used in the database.
Reference	Full Reference
Allard et al., 2005	Allard V, Newton PCD, Lieffering M, Soussana JF, Carran RA, Matthew C (2005) Increased quantity and quality of coarse soil organic matter fraction at elevated co2 in a grazed grassland are a consequence of enhanced root growth rate and turnover. Plant and
Allen et al., 2006	Allen LH, Albrecht SL, Boote KJ, Thomas JMG, Newman YC, Skirvin KW (2006) Soil organic carbon and nitrogen accumulation in plots of rhizoma perennial peanut and bahiagrass grown in elevated carbon dioxide and temperature. Journal of Environmental Quality,
Bazot et al., 2006	Bazot et al., 2006. Effects of elevated CO2 concentration on rhizodeposition from Lolium perenne grown on soil exposed to 9 years of CO2 enrichment. Soil Biology & Biochemistry 38, 729-736.
Blank & Derner, 2004	Blank RR, Derner JD (2004) Effects of co2 enrichment on plant-soil relationships of lepidium latifolium. Plant and Soil, 262, 159-167.
Bloor et al., 2010	Bloor JMG, Pichon P, Falcimagne R, Leadley P, Soussana JF, 2010. Effects of warming, summer drought, and CO2 enrichment on aboveground biomass production, flowering phenology, and community structure in an upland grassland ecosystems. Ecosystems, 13, 888-900.
Bowman et al., 1993	Bowman WD, Theodose TA, Schardt JC, Conant RT (1993) Constraints of nutrient availability on primary production in 2 alpine tundra communities. Ecology, 74, 2085-2097.
Cardon et al., 2001	Cardon et al., 2001. Contrasting effects of elevated CO2 on old and new soil carbon pools. Soil Biology & Biochemistry 33, 365-373.
De Graaff et al., 2004	de Graaff MA, Six J, Harris D, Blum H, van Kessel C (2004) Decomposition of soil and plant carbon from pasture systems after 9 years of exposure to elevated co2: Impact on c cycling and modeling. Global Change Biology, 10, 1922-1935.
Dijkstra et al., 2006	Dijkstra FA, Hobbie SE, Reich PB (2006) Soil processes affected by sixteen grassland species grown under different environmental conditions. Soil Science Society of America Journal, 70, 770-777.
Dijkstra et al., 2010	Dijkstra et al., 2010. Contrasting effects of elevated CO2 and warming on nitrogen cycling in a semiarid grassland. New Phytologist 187, 426-437.
Dukes et al., 2005	Dukes JS, Chiariello NR, Cleland EE, Moore LA, Shaw MR, Thayer S, Tobeck T, Mooney HAField CB. 2005. Responses of Grassland Production to Single and Multiple Global Environmental Changes. Plos Biology 3(10): 1829-1837.
Fitter et al., 1997	Fitter et al., 1997. Root production and turnover and carbon budgets of two contrasting grasslands under ambient and elevated atmospheric carbon dioxide concentrations. New Phytologist 137, 247-255.
Hoorens et al., 2003	Hoorens B, Aerts R, Stroetenga M (2003) Is there a trade-off between the plant's growth response to elevated co2 and subsequent litter decomposability? Oikos, 103, 17-30.
Hungate et al., 1997	Hungate et al., 1997. The fate of carbon in grasslands under carbon dioxide enrichment. Nature 388, 576-579.
Kandeler et al., 1998	Kandeler et al., 1998. The response of soil microorganisms and roots to elevated CO2 and temperature in a terrestrial model ecosystem. Plant and Soil 202, 251-262.
Kanerva et al., 2008	Kanerva T, Palojarvi A, Ramo K, Manninen S (2008) Changes in soil microbial community structure under elevated tropospheric o-3 and co2. Soil Biology & Biochemistry, 40, 2502-2510.
Kardol et al., 2010	Kardol P., Campany C. E., Souza L., Norby R. J., Weltzin J. F., Classen A. T. (2010) Climate change effects on plant biomass alter dominance patterns and community evenness in an experimental old-field ecosystem. Global Change Biology, 16, 2676-2687.
Keeler et al., 2009	Keeler BL, Hobbie SE, Kellogg LE (2009) Effects of long-term nitrogen addition on microbial enzyme activity in eight forested and grassland sites: Implications for litter and soil organic matter decomposition. Ecosystems, 12, 1-15.
Klironomos et al., 1998	Klironomos et al., 1998. Interspecific differences in the response of arbuscular mycorrhizal fungi to Artemisia tridentata grown under elevated atmospheric CO2. New Phytologist 138, 599-605.
Leadley et al., 1999	Leadley et al., 1999. A field study of the effects of elevated CO2 on plant biomass and community structure in a calcareous grassland. Oecologia 118, 39-49.
Lutze et al., 2000	Lutze JL, Gifford RM, Adams HN (2000) Litter quality and decomposition in danthonia richardsonii swards in response to co2 and nitrogen supply over four years of growth. Global Change Biology, 6, 13-24.
Marissink et al., 2002	Marissink et al., 2002. Above-ground plant production under elevated carbon dioxide in a Swedish semi-natural grassland. Agriculture Ecosystems & Environment 93, 107-120.
Morgan et al., 2004	Morgan JA, Mosier AR, Milchunas DG, LeCain DR, Nelson JA, Parton WJ (2004) Co2 enhances productivity, alters species composition, and reduces digestibility of shortgrass steppe vegetation. Ecological Applications, 14, 208-219.
Neff et al., 2002	Neff JC, Townsend AR, Gleixner G, Lehman SJ, Turnbull J, Bowman WD (2002) Variable effects of nitrogen additions on the stability and turnover of soil carbon. Nature, 419, 915-917.
Niklaus & Körner, 1996	Niklaus PA, Korner C (1996) Responses of soil microbiota of a late successional alpine grassland to long term co2 enrichment. Plant and Soil, 184, 219-229.
Niklaus & Körner, 2004	Niklaus PA, Korner C (2004) Synthesis of a six-year study of calcareous grassland responses to in situ co2 enrichment. Ecological Monographs, 74, 491-511.
Niklaus et al., 2003	Niklaus PA, Alphei D, Ebersberger D, Kampichler C, Kandeler E, Tscherko D (2003) Six years of in situ co2 enrichment evoke changes in soil structure and soil biota of nutrient-poor grassland. Global Change Biology, 9, 585-600.
Paterson et al., 2008	Paterson E, Thornton B, Midwood AJ, Osborne SM, Sim A, Millard P. 2008. Atmospheric CO2 enrichment and nutrient additions to planted soil increase mineralisation of soil organic matter, but do not alter microbial utilisation of plant- and soil C-sources.
Pendall & King, 2007	Pendall E, King JY (2007) Soil organic matter dynamics in grassland soils under elevated co2: Insights from long-term incubations and stable isotopes. Soil Biology & Biochemistry, 39, 2628-2639.
Pendall et al., 2011	Pendall et al., 2011. Soil carbon storage under simulated climate change is mediated by plant functional type. Global Change Biology 17, 505-514.
Ross et al., 2004	Ross DJ, Newton PCD, Tate KR (2004) Elevated [co2] effects on herbage production and soil carbon and nitrogen pools and mineralization in a species-rich, grazed pasture on a seasonally dry sand. Plant and Soil, 260, 183-196.
Schäppi & Körner, 1996	Schappi B, Korner C (1996) Growth responses of an alpine grassland to elevated co2. Oecologia, 105, 43-52.
Sonneman & Wolters, 2005	Sonnemann I. & Wolters V. (2005). The microfood web of grassland soils responds to a moderate increase in atmospheric CO2. Global Change Biology, 11, 1148-1155.
Sowerby et al., 2000	Sowerby A, Blum H, Gray TRG, Ball AS (2000) The decomposition of lolium perenne in soils exposed to elevated co2: Comparisons of mass loss of litter with soil respiration and soil microbial biomass. Soil Biology & Biochemistry, 32, 1359-1366.
Stocker et al., 1999	Stocker R, Korner C, Schmid B, Niklaus PA, Leadley PW (1999) A field study of the effects of elevated co2 and plant species diversity on ecosystem-level gas exchange in a planted calcareous grassland. Global Change Biology, 5, 95-105.
Treonis & Lussenhop, 1997	Treonis & Lussenhop, 1997. Rapid response of soil protozoa to elevated CO2. Biology and Fertility of Soils 25, 60-62.
Van Kleunen et al., 2006	Van Kleunen et al., 2006. [CO2]- and denstity-dependant competition between grassland species. Global Change Biology 12, 2175-2186.
Volder et al., 2007	Volder et al., 2007. Effects of elevated atmospheric CO2, cutting frequency, and differential day/night atmospheric warming on root growth and turnover of Phalaris swards. Global Change Biology 13, 1040-1052.
Xia et al., 2009	Xia JY, Niu SL, Wan SQ (2009) Response of ecosystem carbon exchange to warming and nitrogen addition during two hydrologically contrasting growing seasons in a temperate steppe. Global Change Biology, 15, 1544-1556.
